# Supplementary material for: Disruption to routine diabetes care processes during the pandemic: evidence from a large integrated health system in the Southeast United States
Source: PubMed Central journal article supplement — BMJ Open Diabetes Res Care. 2023 Jul 11;11(4):e003466. doi: 10.1136/bmjdrc-2023-003466 (PMC10347511; doi:10.1136/bmjdrc-2023-003466), 2023-07-11
Supplement: bmjdrc-2023-003466supp001.pdf [file bmjdrc-2023-003466supp001.pdf]

**Supplementary Table 1** Baseline characteristics of adult KPGA members with diabetes included and not included in study

| Characteristic                                | Included        | Not included*   |
|-----------------------------------------------|-----------------|-----------------|
| <i>N</i>                                      | 22,854          | 15,216          |
| <i>Demographics</i>                           |                 |                 |
| Age (years, mean (SD))                        | 59.4 (13.0)     | 55.9 (15.0)     |
| Men (%)                                       | 44.5            | 45.4            |
| Race (%)                                      |                 |                 |
| White                                         | 32.6            | 35.4            |
| Black                                         | 57.4            | 49.9            |
| Other                                         | 10.0            | 14.9            |
| Social Vulnerability Index (%)                |                 |                 |
| Quartile 1 (low vulnerability)                | 22.8            | 23.6            |
| Quartile 2                                    | 28.6            | 28.2            |
| Quartile 3                                    | 27.3            | 26.1            |
| Quartile 4 (high vulnerability)               | 21.3            | 21.9            |
| Household income (\$USD; %)                   | 70,300 (27,300) | 69,900 (27,200) |
| ≤\$50,000                                     | 24.0            | 24.6            |
| \$50,001-\$100,000                            | 64.1            | 63.6            |
| \$100,001-\$150,000                           | 10.1            | 9.6             |
| >\$150,000                                    | 1.9             | 1.7             |
| <i>Healthcare access</i>                      |                 |                 |
| Flu shot in 2018 (%)                          | 68.6            | 53.6            |
| Wellness visit in 2018 (%)                    | 66.4            | 53.1            |
| <i>Comorbidities</i>                          |                 |                 |
| Body Mass Index kg/m <sup>2</sup> (mean (SD)) | 33.1 (7.15)     | 33.2 (7.45)     |
| BMI (%)                                       |                 |                 |
| Not obese (<30 kg/m <sup>2</sup> )            | 37.0            | 37.4            |
| Obese (≥30 kg/m <sup>2</sup> )                | 62.6            | 62.5            |
| Smoker (%)                                    | 10.7            | 13.0            |
| Hypertension (%)                              | 81.7            | 72.8            |
| Depression (%)                                | 29.4            | 29.2            |
| Chronic lung disease (%)                      | 36.5            | 30.6            |
| Renal failure (%)                             | 20.2            | 18.7            |
| Congestive heart failure (%)                  | 12.9            | 14.7            |
| Peripheral vascular disease (%)               | 26.8            | 19.8            |
| Retinopathy                                   | 31.6            | 22.0            |
| Neuropathy                                    | 22.5            | 20.7            |

Abbreviations: BMI = body mass index; SD = standard deviation); USD = United States dollars;

\*Not included because died (n=2,159) or discontinued enrolment with KPGA (n=13,057) during follow-up

**Supplementary Table 2** Linear GEE regression comparing mean diabetes care measurements in the during vs. pre pandemic period among KPGA adult members with prevalent diabetes who did and did not meeting annual screening guidelines for each care measurement, 2018-2021

| Diabetes Care Process              | Met annual guidelines    |                             |                                  |                           | Did not meet annual guidelines |                             |                                  |                           |
|------------------------------------|--------------------------|-----------------------------|----------------------------------|---------------------------|--------------------------------|-----------------------------|----------------------------------|---------------------------|
|                                    | Pre-Pandemic (2018-2019) | During Pandemic (2020-2021) | Absolute Change (During vs. Pre) | Mean Difference (95%CI)*  | Pre-Pandemic (2018-2019)       | During Pandemic (2020-2021) | Absolute Change (During vs. Pre) | Mean Difference (95%CI)*  |
| HbA1c (mean; %)                    | 7.4 (1.6)                | 7.4 (1.6)                   | +0.09                            | 0.12 (0.10, 0.14)         | 6.6 (1.9)                      | 7.0 (2.1)                   | +0.35                            | 0.31 (0.24, 0.38)         |
| Systolic BP (mean (SD); mmHg)      | 132.3 (11.9)             | 134.0 (12.3)                | +1.70                            | 1.28 (1.14, 1.42)         | 134.0 (16.9)                   | 133.2 (16.3)                | -0.73                            | -1.11 (-2.32, 0.11)       |
| Diastolic BP (mean (SD); mmHg)     | 72.2 (8.6)               | 71.9 (8.9)                  | -0.35                            | 0.31 (0.22, 0.39)         | 75.9 (10.9)                    | 74.9 (10.5)                 | -1.00                            | 0.03 (-0.57, 0.64)        |
| LDL cholesterol (mean (SD); mg/dL) | 100.1 (42.0)             | 89.8 (34.5)                 | -10.3                            | -8.00 (-8.93, 7.06)       | 102.3 (40.2)                   | 94.2 (37.8)                 | -8.1                             | -7.58 (-8.39, -6.76)      |
| Creatinine (mean (SD) mg/dL)       | 1.1 (0.6)                | 1.1 (0.7)                   | +0.02                            | 0.01 (0.00, 0.02)         | 1.1 (1.1)                      | 1.1 (1.1)                   | +0.03                            | -0.05 (-0.07, -0.04)      |
|                                    |                          |                             |                                  | <b>Odds Ratio (95%CI)</b> |                                |                             |                                  | <b>Odds Ratio (95%CI)</b> |
| UACR (% >300mg/g)**                | 7.3                      | 11.5                        | +4.2                             | 1.62 (1.45, 1.81)         | 5.6                            | 7.1                         | +1.5                             | 1.29 (1.12, 1.47)         |

\*Compares during vs. pre period, adjusted for baseline age; a 95%CI that doesn't include 0 is significant

\*\*UACR was highly skewed and thus we compared the proportion of those with high risk of kidney disease (UACR >300 mg/g) pre and during the pandemic, and reported OR (95%CI) adjusted for baseline age

Missingness: Pre-Pandemic: HbA1c = 6.7%; BP = 1.7%; cholesterol = 19.0%; creatinine = 7.0%; UACR = 31.8%

During Pandemic: HbA1c = 8.2%; BP = 13.2%; cholesterol = 26.8%; creatinine = 6.3%; UACR = 39.4%

Abbreviations: BP = Blood Pressure; GEE = generalized estimating equation; IQR = interquartile range; KPGA = Kaiser Permanente Georgia; UACR = Urine-albumin-creatinine ratio

**Supplementary Table 3** Logistic GEE regression comparing odds of completing at least one diabetes screening in the during vs. pre pandemic period among KPGA adult members with prevalent diabetes 2018-2021

| Diabetes Care Process | % Meeting Guidelines     |                             | Absolute Change (During vs. Pre) | Odds Ratio (95%CI)* |
|-----------------------|--------------------------|-----------------------------|----------------------------------|---------------------|
|                       | Pre-Pandemic (2018-2019) | During Pandemic (2020-2021) |                                  |                     |
| HbA1c                 | 93.8                     | 92.70                       | -1.1                             | 0.83 (0.77, 0.90)   |
| Blood Pressure        | 98.4                     | 96.4                        | -2.0                             | 0.43 (0.38, 0.49)   |
| Cholesterol           | 81.6                     | 74.3                        | -7.3                             | 0.65 (0.62, 0.68)   |
| Creatinine            | 93.6                     | 94.6                        | 1.0                              | 1.20 (1.10, 1.30)   |
| UACR                  | 68.7                     | 61.4                        | -7.3                             | 0.72 (0.69, 0.75)   |
| Eye exam              | 40.9                     | 39.2                        | -1.7                             | 0.92 (0.88, 0.96)   |
| Foot exam             | 6.0                      | 5.3                         | -0.7                             | 0.88 (0.81, 0.95)   |

\*Compares during vs. pre period, adjusted for baseline age.

Abbreviations: GEE = generalized estimating equation; KPGA = Kaiser Permanente Georgia; UACR = Urine-albumin-creatinine ratio

**Supplementary Table 4** Logistic GEE regression comparing odds of completing at least one diabetes screening in the during vs. pre pandemic period among KPGA adult members with prevalent diabetes 2018-2021, stratified by age, sex, and race

| Diabetes Care Process | % Meeting Guidelines     |                             | Absolute change (During vs. Pre) | Odds Ratio (95%CI)* |
|-----------------------|--------------------------|-----------------------------|----------------------------------|---------------------|
|                       | Pre Pandemic (2018-2019) | During Pandemic (2020-2021) |                                  |                     |
| <b>By Age</b>         |                          |                             |                                  |                     |
| <i>&lt;50 years</i>   |                          |                             |                                  |                     |
| HbA1c                 | 88.2                     | 86.4                        | -1.8                             | 0.82 (0.74, 0.91)   |
| Blood Pressure        | 97.4                     | 94.5                        | -2.9                             | 0.46 (0.38, 0.57)   |
| Cholesterol           | 75.5                     | 66.4                        | -9.1                             | 0.64 (0.59, 0.70)   |
| Creatinine            | 85.6                     | 88.2                        | 2.6                              | 1.25 (1.11, 1.40)   |
| UACR                  | 54.5                     | 48.4                        | -6.1                             | 0.78 (0.72, 0.85)   |
| Eye exam              | 15.5                     | 13.9                        | -1.6                             | 0.88 (0.79, 0.99)   |
| Foot exam             | 1.3                      | 1.1                         | -0.2                             | NR                  |
| <i>≥ 50 years</i>     |                          |                             |                                  |                     |
| HbA1c                 | 95.4                     | 94.5                        | -0.9                             | 0.89 (0.78, 1.01)   |
| Blood Pressure        | 98.7                     | 97                          | -1.7                             | 0.42 (0.36, 0.49)   |
| Cholesterol           | 83.3                     | 76.5                        | -6.8                             | 0.65 (0.62, 0.69)   |
| Creatinine            | 96                       | 96.4                        | 0.4                              | 1.14 (1.02, 1.27)   |
| UACR                  | 72.8                     | 65.1                        | -7.7                             | 0.70 (0.67, 0.73)   |
| Eye exam              | 48.2                     | 46.5                        | -1.7                             | 0.93 (0.9, 0.97)    |
| Foot exam             | 7.3                      | 6.5                         | -0.8                             | 0.88 (0.81, 0.95)   |
| <b>By Sex</b>         |                          |                             |                                  |                     |
| <i>Women</i>          |                          |                             |                                  |                     |
| HbA1c                 | 93.6                     | 92.2                        | -1.4                             | 0.81 (0.73, 0.90)   |
| Blood Pressure        | 98.9                     | 97                          | -1.9                             | 0.36 (0.29, 0.43)   |
| Cholesterol           | 81.3                     | 73.5                        | -7.8                             | 0.64 (0.60, 0.68)   |
| Creatinine            | 93.7                     | 94.4                        | 0.7                              | 1.13 (1.01, 1.27)   |
| UACR                  | 64                       | 57.1                        | -6.9                             | 0.74 (0.70, 0.78)   |
| Eye exam              | 41.7                     | 39.7                        | -2                               | 0.90 (0.85, 0.96)   |
| Foot exam             | 5.3                      | 4.4                         | -0.9                             | 0.82 (0.73, 0.92)   |
| <i>Men</i>            |                          |                             |                                  |                     |
| HbA1c                 | 94.1                     | 93.3                        | -0.8                             | 0.87 (0.77, 0.98)   |
| Blood Pressure        | 97.8                     | 95.7                        | -2.1                             | 0.50 (0.42, 0.59)   |
| Cholesterol           | 81.9                     | 75.2                        | -6.7                             | 0.67 (0.62, 0.72)   |
| Creatinine            | 93.5                     | 94.8                        | 1.3                              | 1.28 (1.13, 1.45)   |
| UACR                  | 74.6                     | 66.8                        | -7.8                             | 0.68 (0.64, 0.73)   |
| Eye exam              | 39.9                     | 38.7                        | -1.2                             | 0.94 (0.88, 1.0)    |
| Foot exam             | 6.8                      | 6.4                         | -0.4                             | 0.93 (0.83, 1.04)   |
| <b>By Race</b>        |                          |                             |                                  |                     |
| <i>White</i>          |                          |                             |                                  |                     |
| HbA1c                 | 93.2                     | 92.5                        | -0.7                             | 0.89 (0.79, 1.02)   |
| Blood Pressure        | 98.6                     | 96.7                        | -1.9                             | 0.42 (0.33, 0.52)   |
| Cholesterol           | 83.9                     | 77.5                        | -6.4                             | 0.66 (0.61, 0.72)   |
| Creatinine            | 94.0                     | 94.6                        | 0.6                              | 1.12 (0.96, 1.29)   |
| UACR                  | 65.8                     | 57.7                        | -8.1                             | 0.70 (0.66, 0.75)   |
| Eye exam              | 44.2                     | 42.1                        | -2.1                             | 0.90 (0.83, 0.97)   |
| Foot exam             | 5.6                      | 5.4                         | -0.2                             | 0.97 (0.84, 1.11)   |

|                |      |      |      |                   |
|----------------|------|------|------|-------------------|
| <i>Black</i>   |      |      |      |                   |
| HbA1c          | 94.2 | 93.0 | -1.2 | 0.81 (0.73, 0.90) |
| Blood Pressure | 98.5 | 96.5 | -2   | 0.42 (0.35, 0.50) |
| Cholesterol    | 79.6 | 71.6 | -8   | 0.65 (0.61, 0.69) |
| Creatinine     | 93.6 | 94.9 | 1.3  | 1.26 (1.13, 1.41) |
| UACR           | 70.9 | 64.1 | -6.8 | 0.73 (0.69, 0.77) |
| Eye exam       | 39.3 | 38.2 | -1.1 | 0.94 (0.89, 1.00) |
| Foot exam      | 6.8  | 5.9  | -0.9 | 0.85 (0.77, 0.94) |
| <i>Other</i>   |      |      |      |                   |
| HbA1c          | 93.6 | 91.8 | -1.8 | 0.76 (0.61, 0.96) |
| Blood Pressure | 97.2 | 94.9 | -2.3 | 0.52 (0.38, 0.72) |
| Cholesterol    | 85.7 | 78.9 | -6.8 | 0.62 (0.53, 0.72) |
| Creatinine     | 92.5 | 93.1 | 0.6  | 1.12 (0.96, 1.29) |
| UACR           | 65.5 | 57.7 | -7.8 | 0.71 (0.63, 0.80) |
| Eye exam       | 39.1 | 35.7 | -3.4 | 0.84 (0.73, 0.96) |
| Foot exam      | 2.6  | 1.7  | -0.9 | 0.65 (0.43, 0.98) |

\*Compares during vs. pre period, adjusted for baseline age.

Abbreviations: GEE = generalized estimating equation; KPGA = Kaiser Permanente Georgia; UACR = Urine-albumin-creatinine ratio

**Supplementary Table 5** Logistic GEE regression comparing odds of completing meeting annual diabetes care guidelines in the during vs. pre pandemic period among KPGA adult members with prevalent diabetes 2018-2021 and excluding people with prevalent retinopathy, neuropathy, or CHF\*

| Diabetes Care Process     | % Meeting Annual Guidelines |                             | Absolute Change (During vs. Pre) | Odds Ratio (95%CI)** |
|---------------------------|-----------------------------|-----------------------------|----------------------------------|----------------------|
|                           | Pre-Pandemic (2018-2019)    | During Pandemic (2020-2021) |                                  |                      |
| <i>Overall population</i> |                             |                             |                                  |                      |
| HbA1c                     | 79.0                        | 75.1                        | -3.9                             | 0.80 (0.76, 0.83)    |
| Blood Pressure            | 91.0                        | 76.8                        | -14.2                            | 0.32 (0.30, 0.35)    |
| Cholesterol               | 37.9                        | 28.1                        | -9.8                             | 0.63 (0.60, 0.67)    |
| Creatinine                | 68.9                        | 67.1                        | -1.8                             | 0.92 (0.87, 0.97)    |
| UACR                      | 26.1                        | 22.7                        | -3.4                             | 0.83 (0.78, 0.88)    |
| Eye exam                  | 8.8                         | 7.1                         | -1.7                             | 0.77 (0.70, 0.86)    |
| Foot exam                 | 0.3                         | 0.2                         | -0.1                             | 0.51 (0.30, 0.88)    |

\*Study population N=12,347

\*\*Compares during vs. pre period, adjusted for baseline age.

Abbreviations: CHF = congestive heart failure; GEE = generalized estimating equation; KPGA = Kaiser Permanente Georgia; UACR = Urine-albumin-creatinine ratio

**Supplementary Table 6** Logistic GEE regression comparing odds of meeting annual diabetes care guidelines in the during vs. pre pandemic period among KPGA adult members with prevalent diabetes 2018-2021, stratified by age, sex, and race and excluding people with prevalent retinopathy, neuropathy, or CHF\*

| Diabetes Care Process | % Meeting Annual Guidelines |                             | Absolute change (During vs. Pre) | Odds Ratio (95%CI)** |
|-----------------------|-----------------------------|-----------------------------|----------------------------------|----------------------|
|                       | Pre Pandemic (2018-2019)    | During Pandemic (2020-2021) |                                  |                      |
| <b>By Age</b>         |                             |                             |                                  |                      |
| <i>&lt;50 years</i>   |                             |                             |                                  |                      |
| HbA1c                 | 64.2                        | 60.5                        | -3.7                             | 0.85 (0.79, 0.92)    |
| Blood Pressure        | 87.6                        | 70.7                        | -16.9                            | 0.34 (0.30, 0.38)    |
| Cholesterol           | 29.7                        | 20.5                        | -9.2                             | 0.61 (0.55, 0.68)    |
| Creatinine            | 53.4                        | 54.5                        | 1.1                              | 1.04 (0.96, 1.14)    |
| UACR                  | 20.1                        | 16.6                        | -3.5                             | 0.79 (0.71, 0.89)    |
| Eye exam              | 1.8                         | 1.7                         | -0.1                             | 0.94 (0.67, 1.32)    |
| Foot exam             | 0.1                         | 0.0                         | -0.1                             | NR                   |
| <i>≥ 50 years</i>     |                             |                             |                                  |                      |
| HbA1c                 | 83.2                        | 79.3                        | -3.9                             | 0.77 (0.73, 0.82)    |
| Blood Pressure        | 92.6                        | 79.7                        | -12.9                            | 0.31 (0.29, 0.35)    |
| Cholesterol           | 41.7                        | 31.6                        | -10.1                            | 0.72 (0.69, 0.75)    |
| Creatinine            | 76.1                        | 72.9                        | -3.2                             | 0.85 (0.79, 0.91)    |
| UACR                  | 28.9                        | 25.5                        | -3.4                             | 0.79 (0.71, 0.89)    |
| Eye exam              | 12.1                        | 9.6                         | -2.5                             | 0.78 (0.70, 0.85)    |
| Foot exam             | 0.4                         | 0.2                         | -0.2                             | Not reported         |
| <b>By Sex</b>         |                             |                             |                                  |                      |
| <i>Women</i>          |                             |                             |                                  |                      |
| HbA1c                 | 77.3                        | 73.4                        | -3.9                             | 0.80 (0.75, 0.85)    |
| Blood Pressure        | 93.1                        | 79.9                        | -13.2                            | 0.29 (0.26, 0.32)    |
| Cholesterol           | 36.3                        | 26.3                        | -10                              | 0.62 (0.58, 0.67)    |
| Creatinine            | 68.4                        | 65.7                        | -2.7                             | 0.87 (0.81, 0.94)    |
| UACR                  | 22.5                        | 19.5                        | -3                               | 0.83 (0.77, 0.90)    |
| Eye exam              | 8.3                         | 7                           | -1.3                             | 0.82 (0.72, 0.94)    |
| Foot exam             | 0.3                         | 0.1                         | -0.2                             | NR                   |
| <i>Men</i>            |                             |                             |                                  |                      |
| HbA1c                 | 81                          | 77.2                        | -3.8                             | 0.79 (0.74, 0.85)    |
| Blood Pressure        | 88                          | 72.5                        | -15.5                            | 0.35 (0.31, 0.38)    |
| Cholesterol           | 40.2                        | 30.6                        | -9.6                             | 0.65 (0.60, 0.71)    |
| Creatinine            | 69.5                        | 69.1                        | -0.4                             | 0.98 (0.90, 1.07)    |
| UACR                  | 31.3                        | 27.3                        | -4                               | 0.82 (0.76, 0.90)    |
| Eye exam              | 9.5                         | 7.2                         | -2.3                             | 0.71 (0.6, 0.84)     |
| Foot exam             | 0.4                         | 0.2                         | -0.2                             | NR                   |
| <b>By Race</b>        |                             |                             |                                  |                      |
| <i>White</i>          |                             |                             |                                  |                      |
| HbA1c                 | 78.2                        | 75.1                        | -3.1                             | 0.78 (0.73, 0.83)    |
| Blood Pressure        | 91.7                        | 78.3                        | -13.4                            | 0.32 (0.28, 0.36)    |
| Cholesterol           | 42.1                        | 31.4                        | -10.7                            | 0.62 (0.57, 0.68)    |
| Creatinine            | 69.9                        | 67.7                        | -2.2                             | 0.89 (0.81, 0.99)    |
| UACR                  | 24                          | 19.9                        | -4.1                             | 0.78 (0.70, 0.87)    |
| Eye exam              | 11.3                        | 9.1                         | -2.2                             | 0.77 (0.65, 0.91)    |

|                |      |      |       |                   |
|----------------|------|------|-------|-------------------|
| Foot exam      | 0.2  | 0.2  | 0.0   | NR                |
| <i>Black</i>   |      |      |       |                   |
| HbA1c          | 79.3 | 75.1 | -4.2  | 0.78 (0.73, 0.83) |
| Blood Pressure | 91.3 | 77.4 | -13.9 | 0.32 (0.29, 0.36) |
| Cholesterol    | 33.8 | 24.7 | -9.1  | 0.64 (0.59, 0.69) |
| Creatinine     | 68.8 | 67.3 | -1.5  | 0.93 (0.87, 1.00) |
| UACR           | 27.3 | 24.5 | -2.8  | 0.86 (0.80, 0.93) |
| Eye exam       | 7.8  | 6.4  | -1.4  | 0.80 (0.69, 0.92) |
| Foot exam      | 0.4  | 0.2  | -0.2  | NR                |
| <i>Other</i>   |      |      |       |                   |
| HbA1c          | 79.3 | 75.2 | -4.1  | 0.78 (0.68, 0.90) |
| Blood Pressure | 87.7 | 69.5 | -18.2 | 0.32 (0.26, 0.39) |
| Cholesterol    | 47.5 | 36.2 | -11.3 | 0.62 (0.53, 0.73) |
| Creatinine     | 66.4 | 64   | -2.4  | 0.89 (0.76, 1.05) |
| UACR           | 25.7 | 21.1 | -4.6  | 0.77 (0.64, 0.92) |
| Eye exam       | 7.3  | 4.8  | -2.5  | 0.63 (0.45, 0.87) |
| Foot exam      | 0.1  | 0.0  | -0.1  | NR                |

\*Study population N=12,347

\*\*Compares during vs. pre period, adjusted for baseline age.

Abbreviations: CHF = congestive heart failure; GEE = generalized estimating equation; KPGA = Kaiser Permanente Georgia; UACR = Urine-albumin-creatinine ratio

NR = not reported due to small sample size
